# Supplementary material for: Purification and Glutaraldehyde Activation Study on HCl-Doped PVA–PANI Copolymers with Different Aniline Concentrations
Source: PubMed Central journal article supplement (PMC6337460; doi:10.3390/molecules24010063), 2018-12-25
Supplement: molecules-24-00063-s001.pdf [file molecules-24-00063-s001.pdf]

## Supplementary material

### Purification and Glutaraldehyde Activation Study on HCl-Doped PVA-PANI Copolymers with Different Aniline Concentrations

Jorge M. Guerrero <sup>1</sup>, Amanda Carrillo <sup>2,\*</sup>, María L. Mota <sup>2,3</sup>, Roberto C. Ambrosio <sup>4</sup> and Francisco S. Aguirre <sup>1,\*</sup>

<sup>1</sup> Centro de Investigación en Materiales Avanzados, S.C., Alianza Norte 202, Parque de Investigación e Innovación Tecnológica, Apodaca, NL, C.P. 66600, México; [jorge.guerrero@cimav.edu.mx](mailto:jorge.guerrero@cimav.edu.mx) (J.M.G); [servando.aguirre@cimav.edu.mx](mailto:servando.aguirre@cimav.edu.mx) (F.S.A)

<sup>2</sup> Instituto de Ingeniería y Tecnología, Universidad Autónoma de Ciudad Juárez, Av. Del Charro 610, Ciudad Juárez, CHIH, C.P. 32310, México; [amanda.carrillo@uacj.mx](mailto:amanda.carrillo@uacj.mx) (A.C.); [mdllmotago@conacyt.mx](mailto:mdllmotago@conacyt.mx) (M.L.M.)

<sup>3</sup> CONACYT, Universidad Autónoma de Ciudad Juárez, Ciudad Juárez, CHIH, C.P. 32310, México

<sup>4</sup> Facultad de Electrónica, Benemérita Universidad Autónoma de Puebla, Puebla, C.P. 72000, México; [roberto.ambrosio@correo.buap.mx](mailto:roberto.ambrosio@correo.buap.mx) (R.C.A.)

\* Correspondence: [amanda.carrillo@uacj.mx](mailto:amanda.carrillo@uacj.mx), Tel:+52-1-656-688-4800; [servando.aguirre@cimav.edu.mx](mailto:servando.aguirre@cimav.edu.mx); Tel.: +52-1-811-721-6676

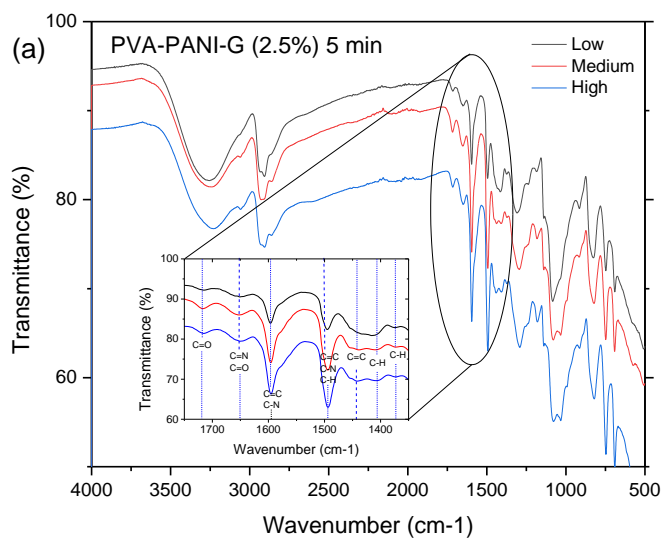

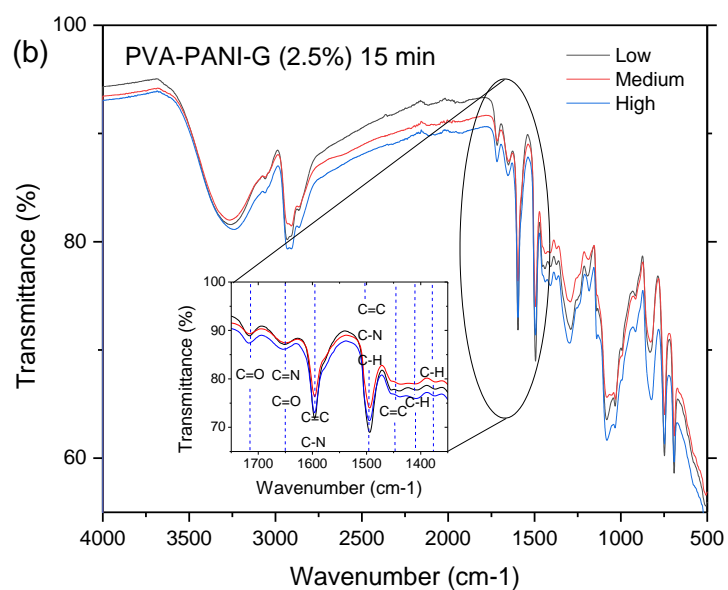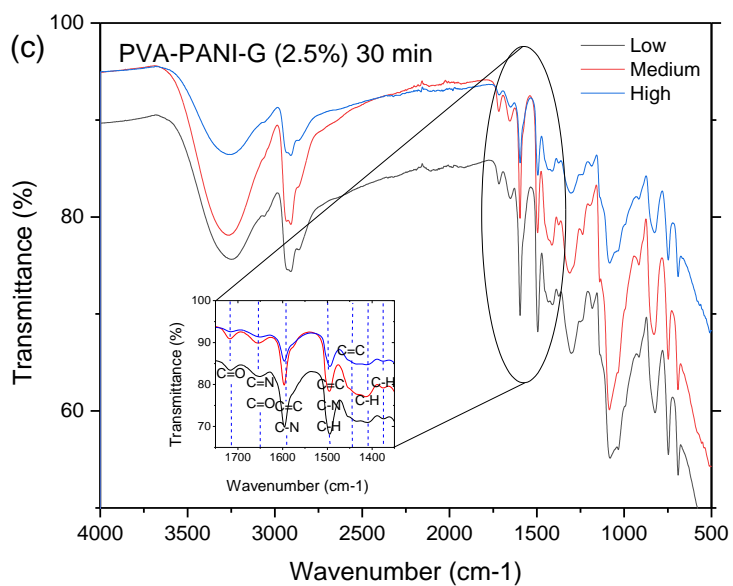

**Figure S1:** FTIR spectra of PVA-PANI gels at low, medium and high concentration of PANI activated with GA at 2.5% for: a) 5 min, b) 15 min, c) 30 min.

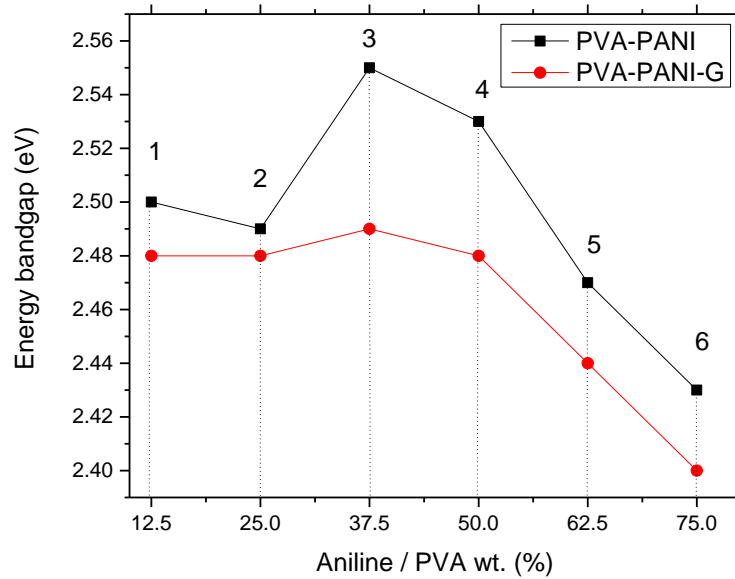

Figure S2: Bandgap variation of PV-PANI and PVA-PANI-G for different monomer concentrations.

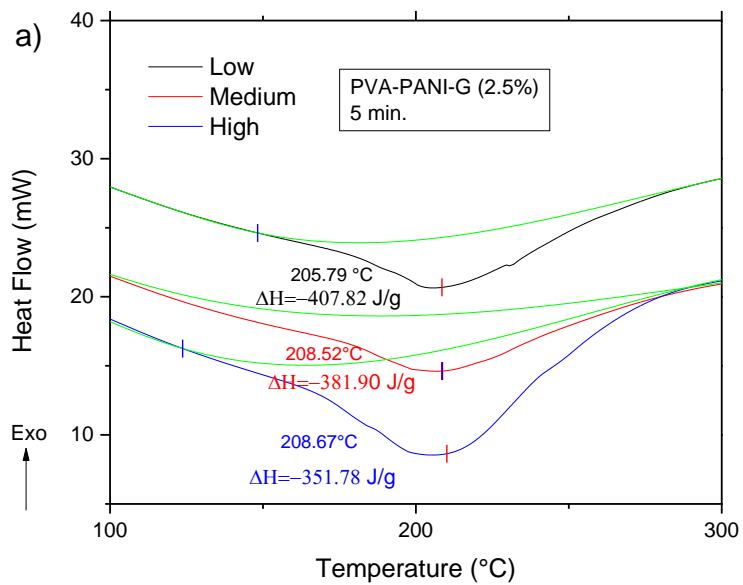

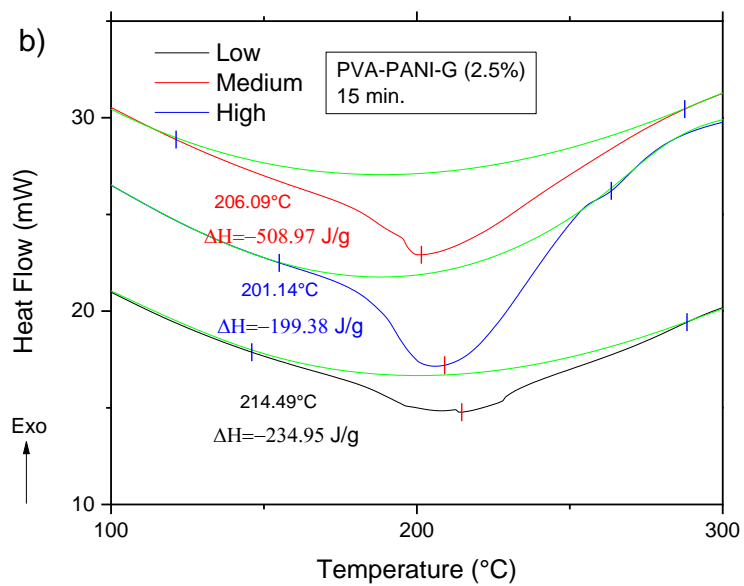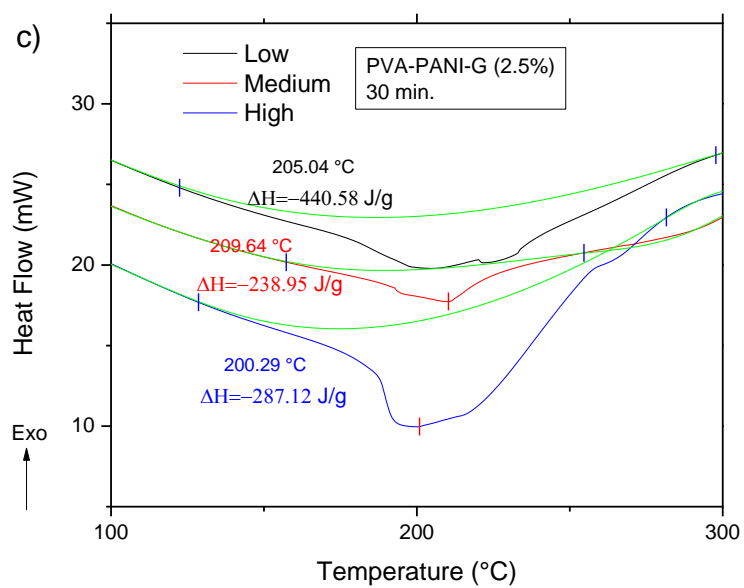

**Figure S3:** DSC thermogram of purified PVA-PANI gels at low, medium and high concentration of PANI activated with GA at 2.5% for: a) 5 min, b) 15 min, c) 30 min.

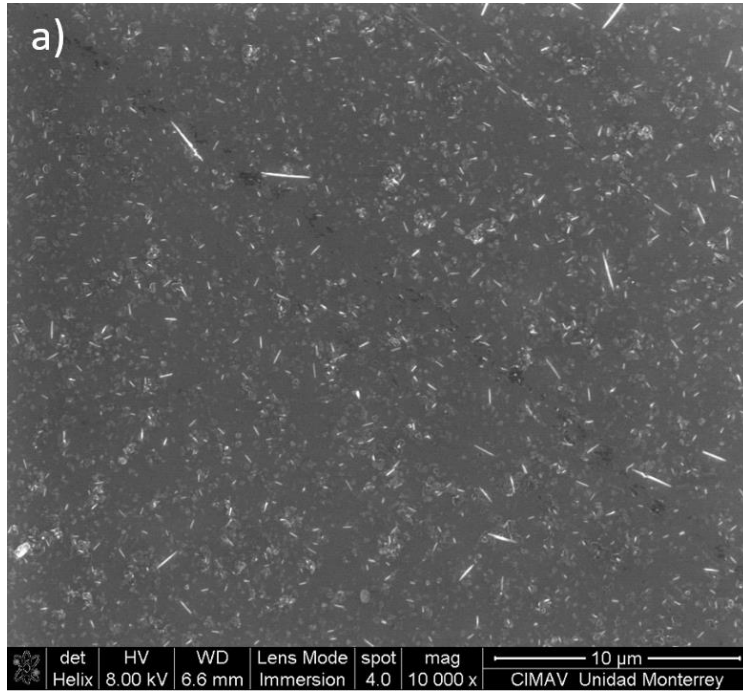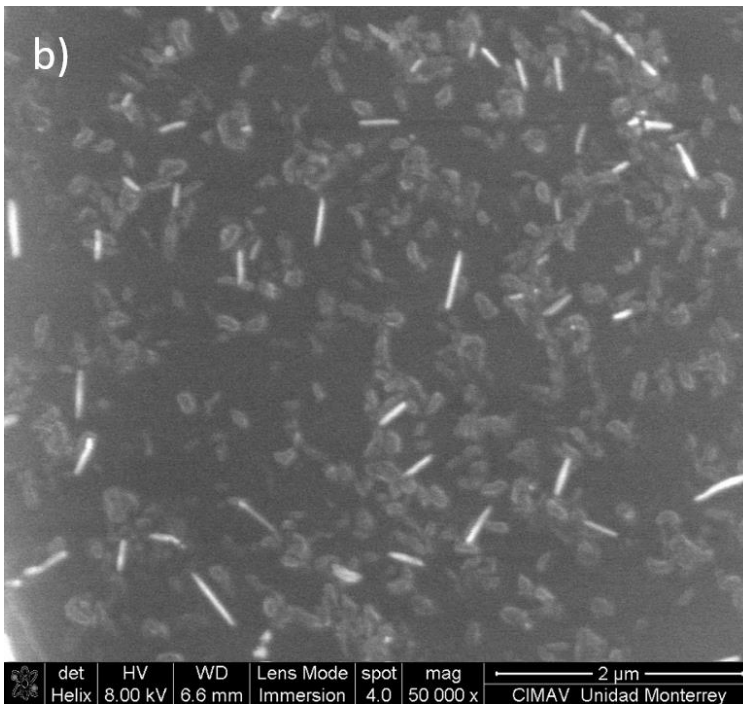

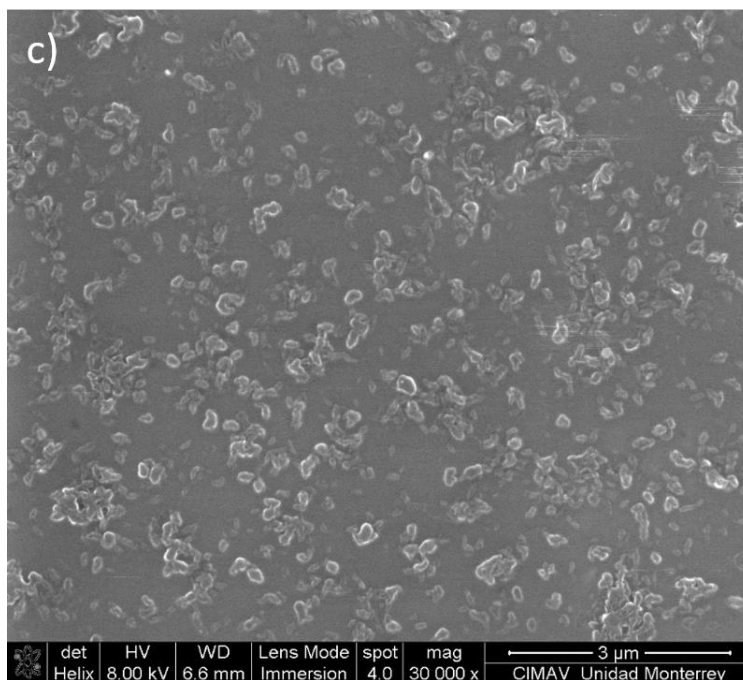

**Figure S4:** SEM micrographs of purified PVA-PANI thin films at a) low, b) medium and c) high concentration of aniline activated with 1% GA for 30 minutes.
